# Supplementary material for: An SiO2/ZnBr2mediated expeditious approach to 3-methyl-1-phenyl-1H-pyrazol-5(4H)-one derivatives in water under microwave irradiation
Source: Royal Society of Chemistry journal article supplement (doi:10.1039/c5ra21146h), 2015-12-15
Supplement: c5ra21146h1.pdf [file c5ra21146h1.pdf]

## Supplementary Information

### **SiO<sub>2</sub>/ZnBr<sub>2</sub> mediated expeditious approach to 3-methyl-1-phenyl-1*H*-pyrazol-5(4*H*)-one derivatives in water under microwave irradiation**

Mehtab Parveen,<sup>\*a</sup> Shaista Azaz,<sup>a</sup> Ali Mohammed Malla,<sup>a</sup> Faheem Ahmad,<sup>a</sup> Musheer Ahmad<sup>b,c</sup>,  
Mayank Gupta<sup>b</sup>

<sup>a</sup>*Division of Organic Synthesis, Department of Chemistry, Aligarh Muslim University, Aligarh, 202002, India*

<sup>b</sup>*Department of Chemistry, Indian Institute of Technology Kanpur, 208016, India*

<sup>c</sup>*Department of Applied Chemistry, Aligarh Muslim University, Aligarh 202002, India*

---

<sup>\*</sup>*Corresponding author (Mehtab Parveen), E-mail: mehtab.organic2009@gmail.com; Tel: +91-9897179498*

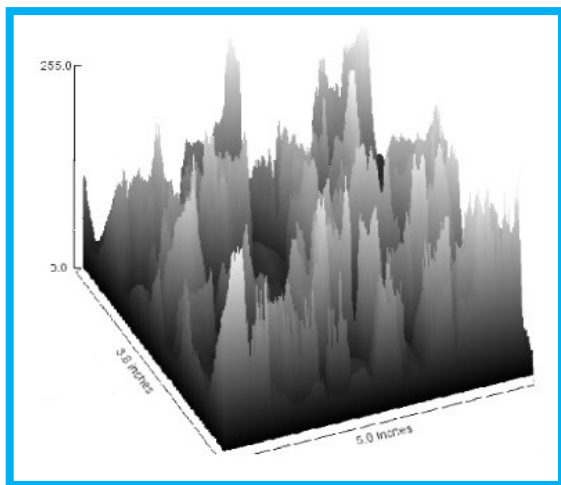

(a)

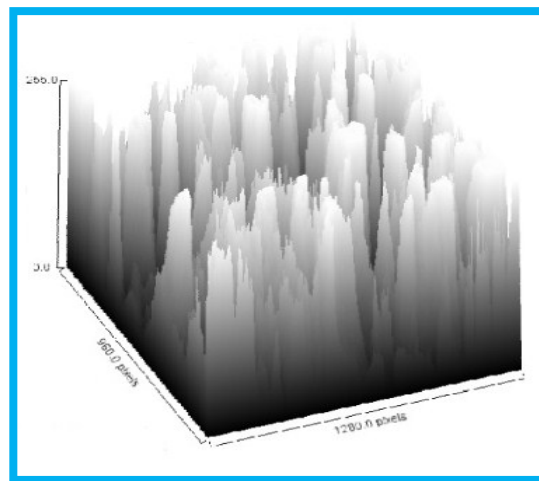

(b)

**Fig. S1** 3D Surface Plot of (a) pure  $\text{SiO}_2$  (b)  $\text{SiO}_2/\text{ZnBr}_2$  catalyst.

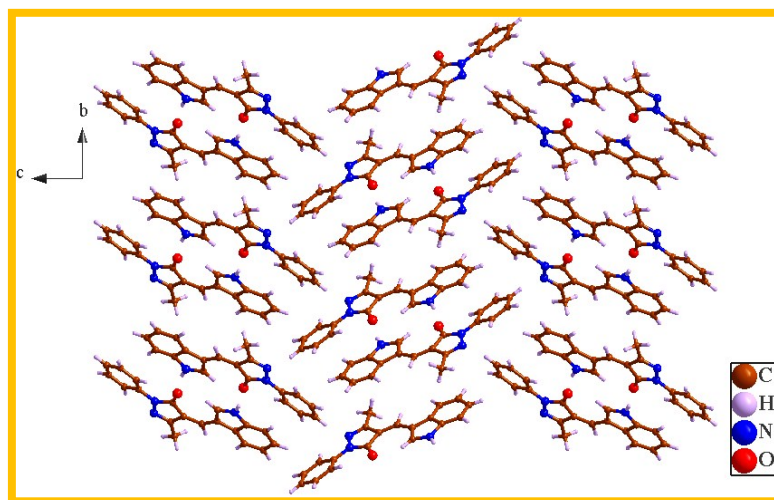

(a)

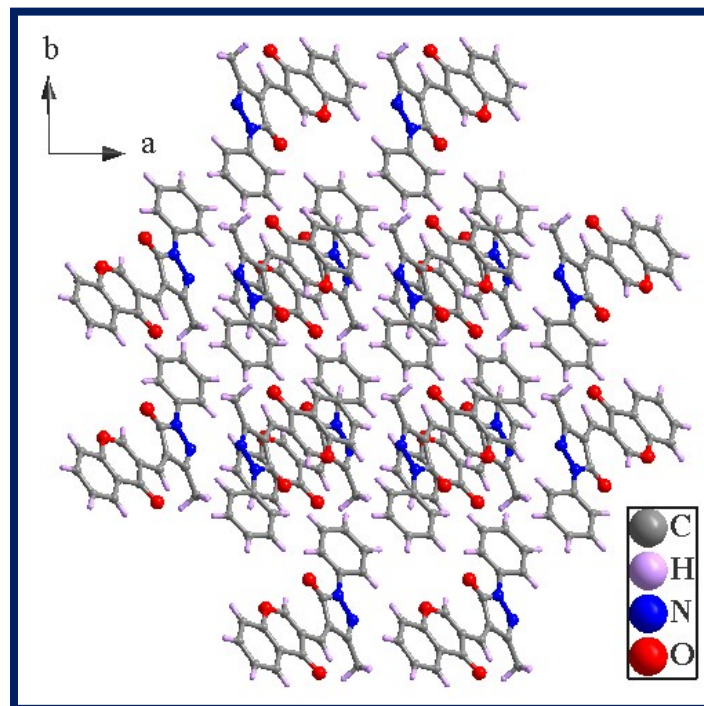

(b)

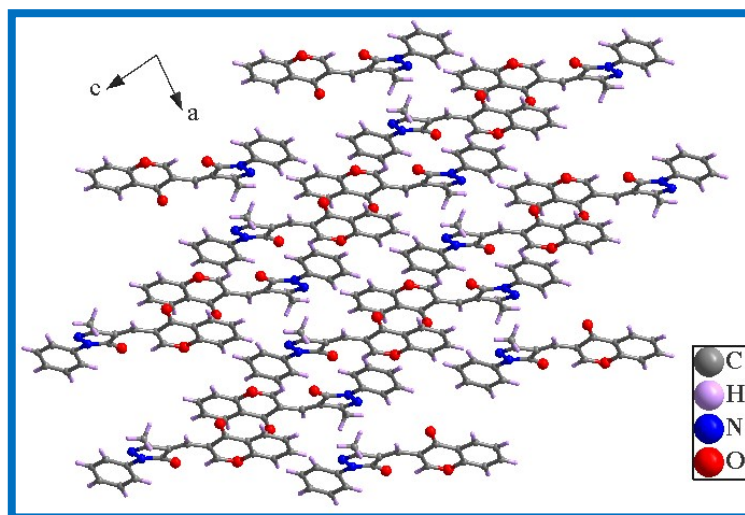

(c)

**Fig. S2** Representation of 2D view along crystallographic (a) a-axis of compound **2a** (b) c-axis of compound **2d** (c) ac place of compound **2d**

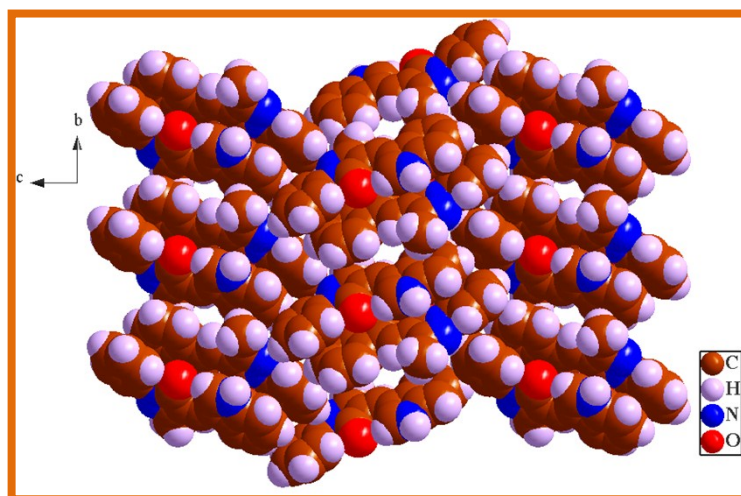

(a)

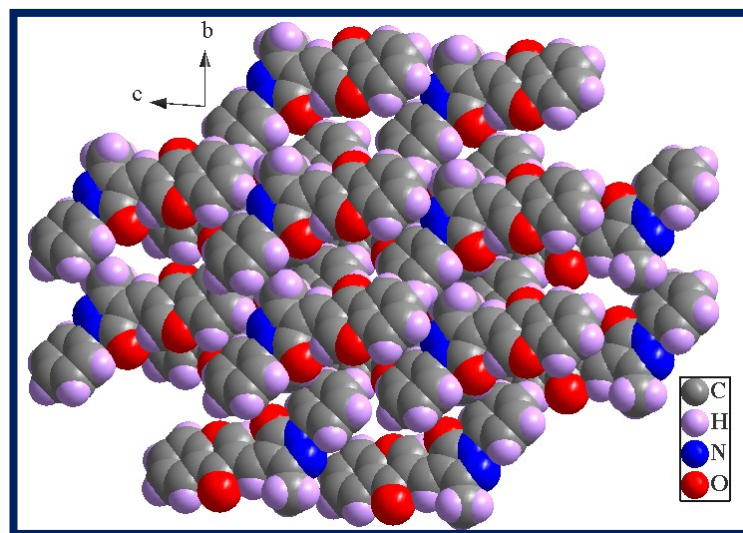

(b)

**Fig. S3** Representation of 2D view in CPK model along crystallographic a-axis of **(a)** compound **2a** **(b)** compound **2d**

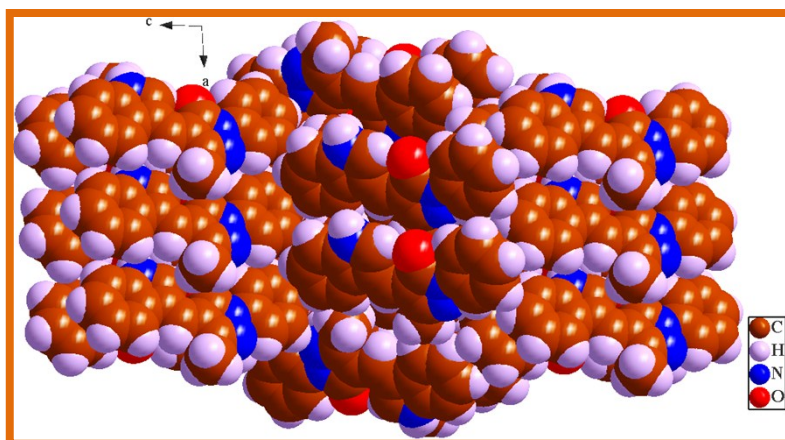

**Fig. S4** Representation of 2D view in CPK model along crystallographic b-axis of compound **2a**

**Table S1** Selected bond distances (Å) and bond angles (°) in compound **2a**

|                       |                       |                     |
|-----------------------|-----------------------|---------------------|
| C1 N1 1.386(3)        | C1 C2 1.394(2)        | C1 C6 1.404(3)      |
| C2 C3 1.375(3)        | C3 C4 1.398(3)        | C4 C5 1.382(3)      |
| C5 C6 1.385(3)        | C6 C7 1.456(2)        | C7 C8 1.388(3)      |
| C7 C9 1.420(3)        | C8 N1 1.351(2)        | C9 C10 1.368(3)     |
| C10 C12 1.446(3)      | C10 C11 1.465(3)      | C11 O1 1.235(2)     |
| C11 N2 1.383(2)       | C12 N3 1.303(2)       | C12 C13 1.483(3)    |
| C14 C15 1.389(3)      | C14 C19 1.393(3)      | C14 N2 1.418(2)     |
| C15 C16 1.388(3)      | C16 C17 1.381(3)      | C17 C18 1.379(3)    |
| C18 C19 1.381(3)      |                       |                     |
| N1 C1 C2 130.18(18)   | N1 C1 C6 107.75(16)   | C2 C1 C6 122.06(18) |
| C3 C2 C1 117.55(18)   | C2 C3 C4 121.09(18)   | C5 C4 C3 121.04(19) |
| C4 C5 C6 119.02(18)   | C5 C6 C1 119.21(17)   | C5 C6 C7 134.22(18) |
| C1 C6 C7 106.55(17)   | C8 C7 C9 130.71(18)   | C8 C7 C6 106.01(16) |
| C9 C7 C6 123.28(18)   | N1 C8 C7 109.92(17)   | C10C9 C7 133.47(19) |
| C9 C10 C12 123.43(18) | C9 C10 C11 131.70(18) | O1C11 N2 126.06(17) |
| C15 C14 N2 121.29(16) | C19 C14 N2 119.04(17) | C8 N1 C1 109.77(17) |
| C11 N2 N3 112.50(14)  | C11 N2 C14 130.25(16) | N3N2C14 117.08(14)  |
| C12 N3 N2 106.44(15)  |                       |                     |

CCDC Number for this molecule: **CCDC 1409997**

**Table S2** Selected bond distances (Å) and bond angles (°) in compound **2d**

|                        |                        |                        |
|------------------------|------------------------|------------------------|
| C1 O1 1.3414(18)       | C1 C9 1.355(2)         | C2 O1 1.3823(18)       |
| C2 C3 1.385(2)         | C2 C7 1.391(2)         | C3 C4 1.379(2)         |
| C4 C5 1.394(2)         | C5 C6 1.375(2)         | C6 C7 1.394(2)         |
| C7 C8 1.464(2)         | C8 O2 1.2272(18)       | C8 C9 1.474(2)         |
| C9 C10 1.447(2)        | C10 C11 1.349(2)       | C11 C13 1.454(2)       |
| C11 C12 1.484(2)       | C12 O3 1.2256(19)      | C12 N1 1.378(2)        |
| C13 N2 1.294(2)        | C13 C14 1.491(2)       | C15 C20 1.390(2)       |
| C15 C16 1.396(2)       | C15 N1 1.421(2)        | C16 C17 1.385(2)       |
| C17 C18 1.382(2)       | C18 C19 1.384(2)       | C19 C20 1.385(2)       |
|                        |                        |                        |
| O1 C1 C9 124.91(14)    | O1 C2 C3 116.27(13)    | O1 C2 C7 121.65(13)    |
| C3 C2 C7 122.08(14)    | C4 C3 C2 118.80(15)    | C3 C4 C5 120.15(15)    |
| C6 C5 C4 120.39(15)    | C5 C6 C7 120.54(15)    | C2 C7 C6 118.00(14)    |
| C2 C7 C8 119.96(14)    | C6 C7 C8 122.04(14)    | O2 C8 C7 122.82(14)    |
| O2 C8 C9 122.17(14)    | C7 C8 C9 114.99(13)    | C1 C9 C10 125.01(14)   |
| C1 C9 C8 119.28(14)    | C10 C9 C8 115.64(13)   | C11 C10 C9 134.04(15)  |
| O3 C12 N1 126.01(14)   | O3 C12 C11 130.24(14)  | N1 C12 C11 103.74(13)  |
| N2 C13 C11 112.42(14)  | N2 C13 C14 120.99(14)  | C11 C13 C14 126.52(14) |
| C20 C15 C16 120.09(15) | C20 C15 N1 120.98(14)  | C16 C15 N1 118.92(14)  |
| C18 C19 C20 121.15(15) | C19 C20 C15 119.19(15) | C12 N1 N2 112.96(12)   |
| C12 N1 C15 128.90(13)  | N2 N1 C15 118.13(12)   | C13 N2 N1 106.65(12)   |
| C1 O1 C2 118.92(12)    |                        |                        |

CCDC Number for this molecule: **CCDC 1432605**

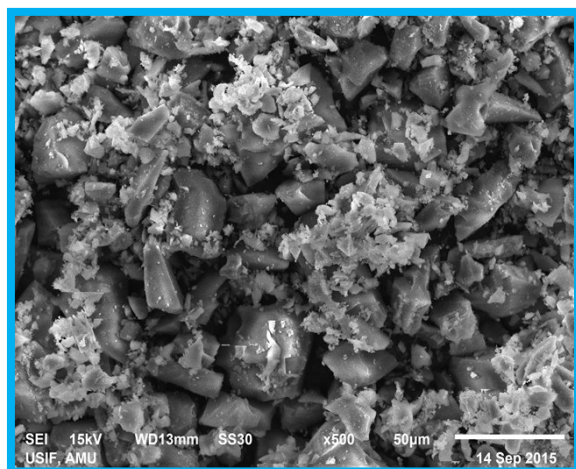

(a)

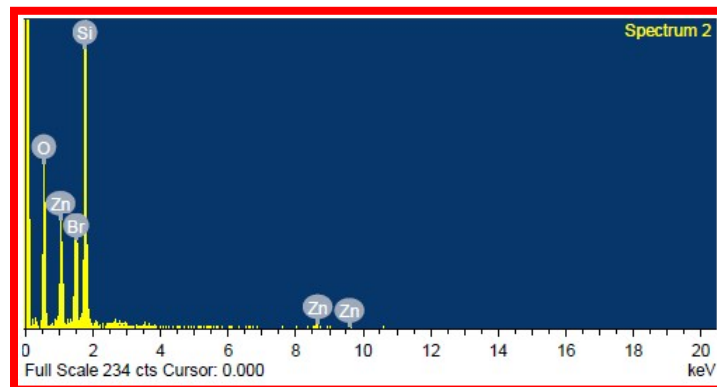

(b)

**Fig. S5** (a) SEM micrograph (b) EDX spectrum of the recovered catalyst ( $\text{SiO}_2/\text{ZnBr}_2$ )



# <sup>1</sup>H and <sup>13</sup>C NMR of Compounds (2a, 2d and 2m)

I-P

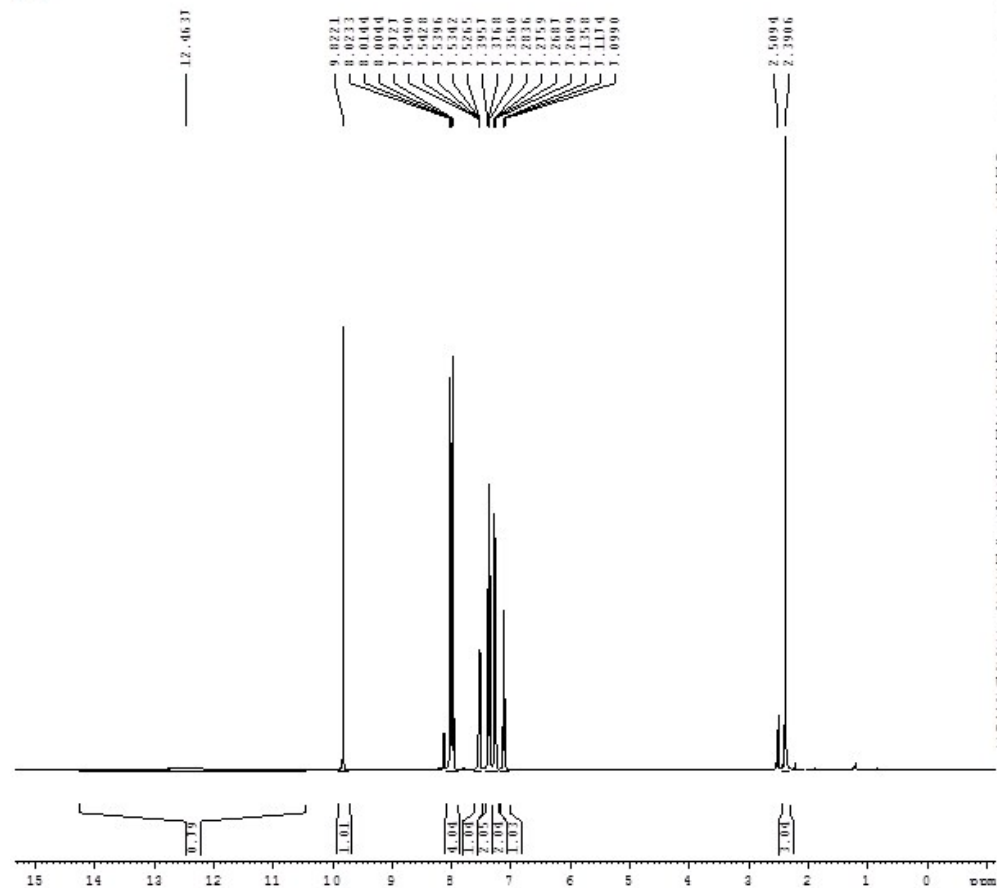

BRUKER  
 AVANCE II 400 NMR  
 Spectrometer  
 SAIF  
 Panjab University  
 Chandigarh

Current Data Parameters  
 NAME May14-2015  
 EXPNO 11  
 PROCNO 1

F2 - Acquisition Parameters  
 Date\_ 20150515  
 Time 0.41  
 INSTRUM spect  
 PROBHD 5 mm PABBO BB-  
 PULPROG zg30  
 TD 65536  
 SOLVENT DMSO  
 NS 16  
 DS 2  
 SWH 12019.230 Hz  
 FIDRES 0.183399 Hz  
 AQ 2.7263477 sec  
 RG 161  
 DW 41.600 usec  
 DE 6.00 usec  
 TE 295.5 K  
 D1 1.00000000 sec  
 D10 1

===== CHANNEL f1 =====  
 NUC1 1H  
 P1 10.90 usec  
 PL1 -3.00 dB  
 SFO1 400.1324710 MHz

F2 - Processing parameters  
 SI 32768  
 SF 400.1300000 MHz  
 WDW EM  
 SSB 0  
 LB 0.30 Hz  
 GB 0  
 PC 1.00

avtar saifpu@yahoo.co.in

## <sup>1</sup>H NMR of compound 2a

I-P

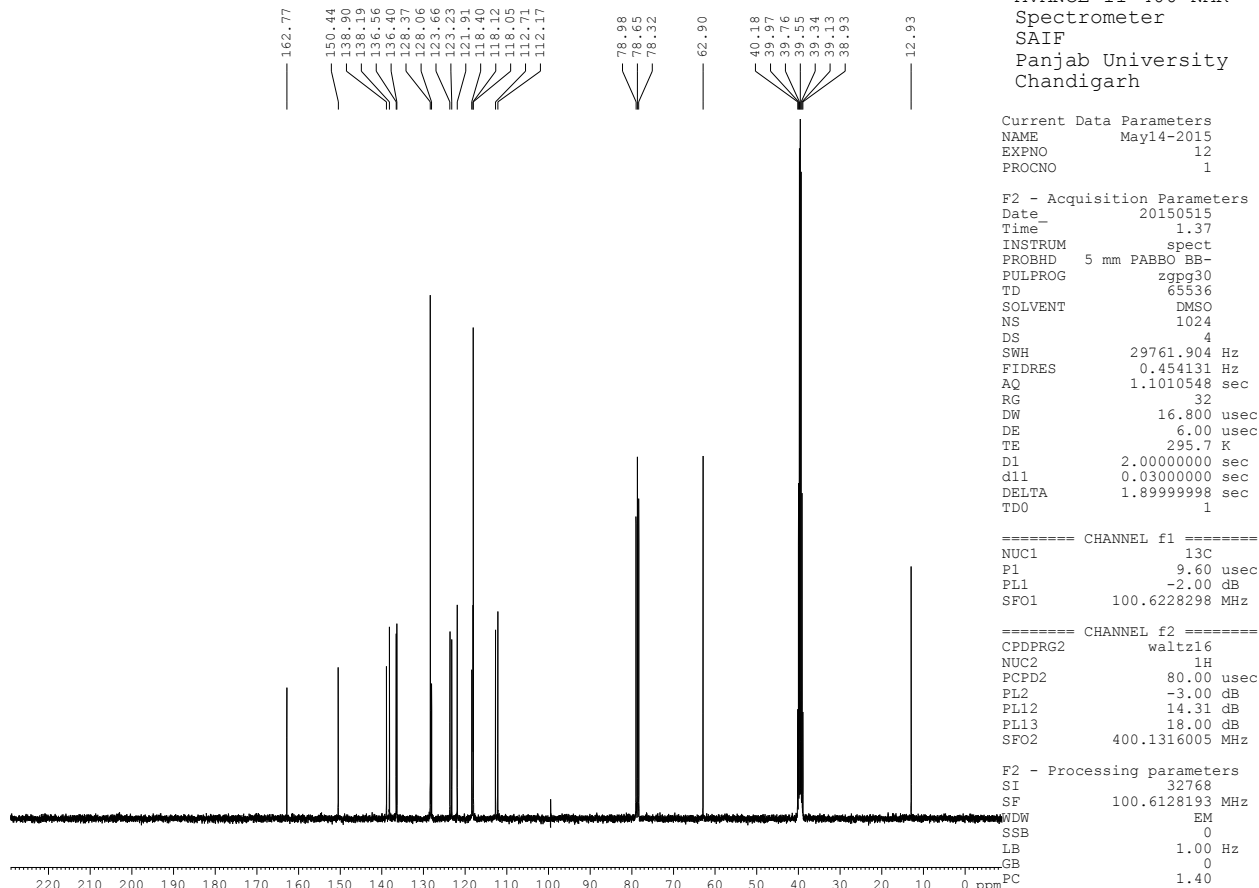

avtar\_saifpu@yahoo.co.in

<sup>13</sup>C NMR of compound 2a



3F-P

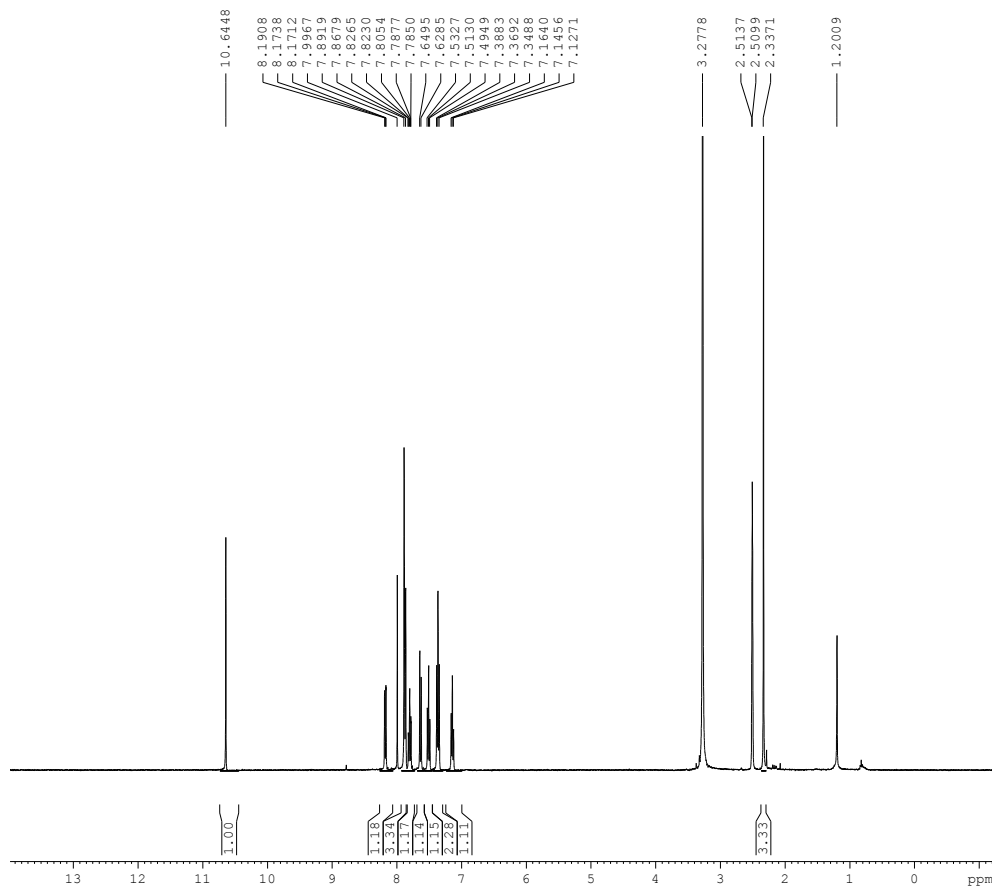

BRUKER  
AVANCE II 400 NMR  
Spectrometer  
SAIF  
Panjab University  
Chandigarh

Current Data Parameters  
NAME May14-2015  
EXPNO 600  
PROCNO 1

F2 - Acquisition Parameters  
Date\_ 20150514  
Time\_ 23.40  
INSTRUM spect  
PROBHD 5 mm PABBO BB-  
PULPROG zg30  
TD 65536  
SOLVENT DMSO  
NS 16  
DS 2  
SWH 12019.230 Hz  
FIDRES 0.183399 Hz  
AQ 2.7263477 sec  
RG 575  
DW 41.600 usec  
DE 6.00 usec  
TE 295.8 K  
D1 1.00000000 sec  
TD0 1

===== CHANNEL f1 =====  
NUC1 1H  
P1 10.90 usec  
PL1 -3.00 dB  
SFO1 400.1324710 MHz

F2 - Processing parameters  
SI 32768  
SF 400.1300000 MHz  
WDW EM  
SSB 0  
LB 0.30 Hz  
GB 0  
PC 1.00

avtar\_saifpu@yahoo.co.in

$^1\text{H}$  NMR of compound **2d**

3F-P

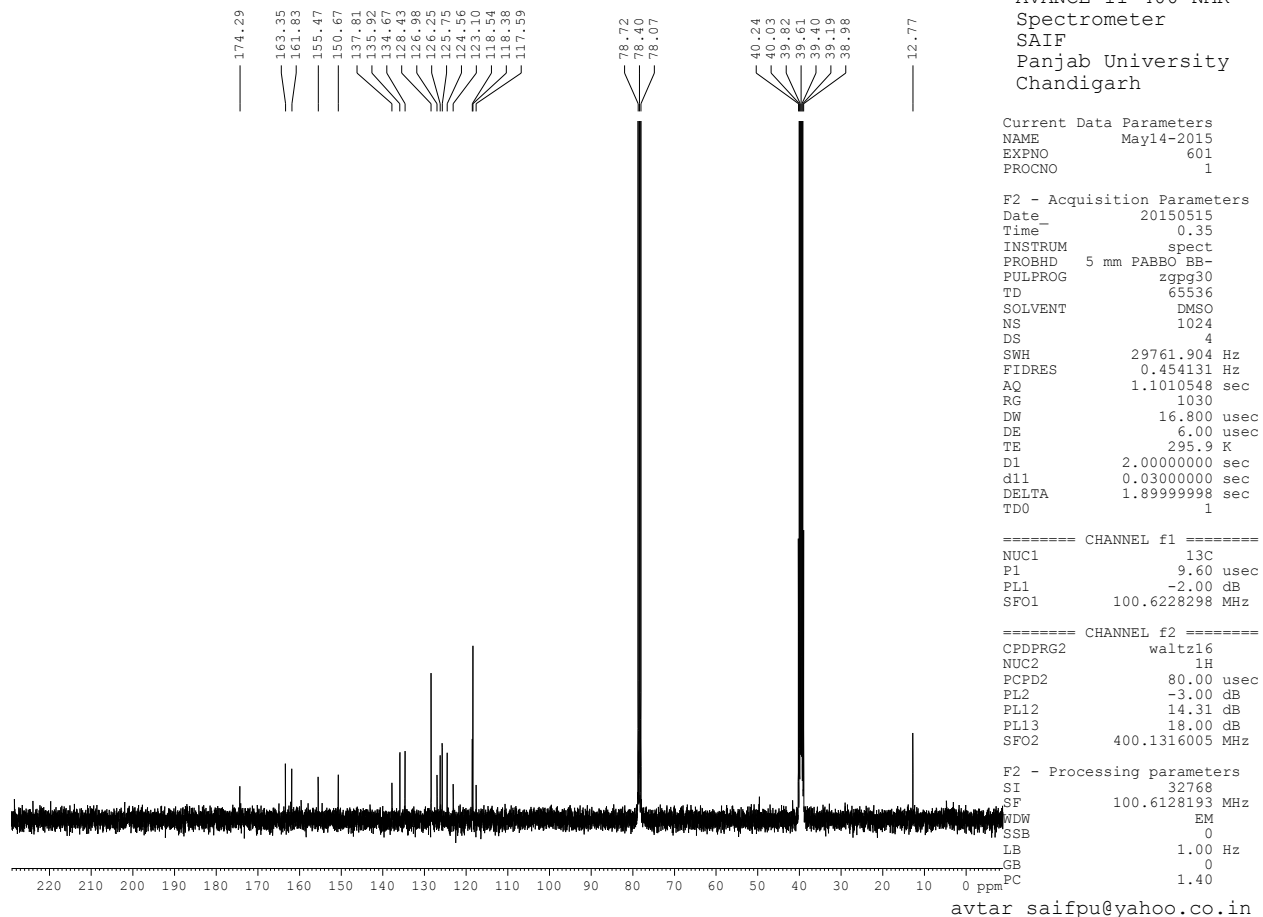

$^{13}\text{C}$  NMR of compound **2d**

NMe-P

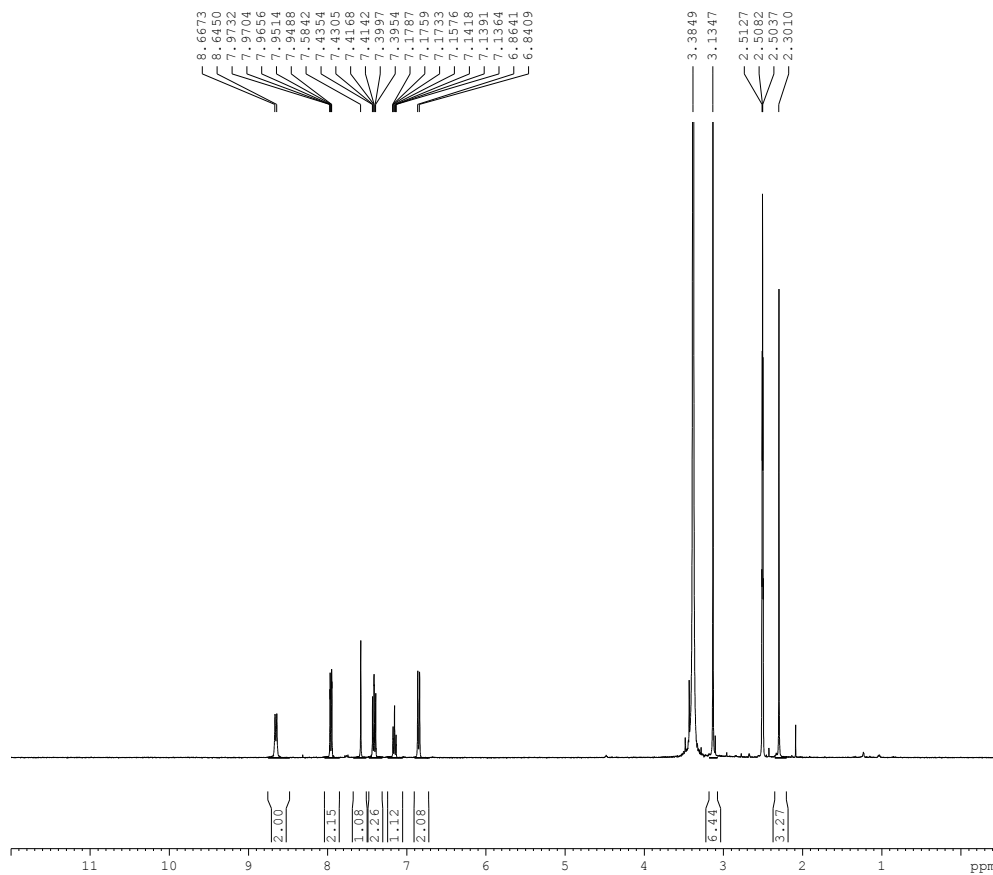

BRUKER  
AVANCE II 400 NMR  
Spectrometer  
SAIF  
Panjab University  
Chandigarh

Current Data Parameters  
NAME Feb02-2015-Administrator  
EXPNO 420  
PROCNO 1

F2 - Acquisition Parameters  
Date\_ 20150203  
Time 5.24  
INSTRUM spect  
PROBHD 5 mm PABBO BB-  
PULPROG zg30  
TD 65536  
SOLVENT DMSO  
NS 16  
DS 2  
SWH 8223.685 Hz  
FIDRES 0.125483 Hz  
AQ 3.9846387 sec  
RG 322  
DW 60.800 usec  
DE 6.00 usec  
TE 293.8 K  
D1 1.00000000 sec  
TDO 1

===== CHANNEL f1 =====  
NUC1 1H  
P1 10.90 usec  
PL1 -3.00 dB  
SFO1 400.1324710 MHz

F2 - Processing parameters  
SI 32768  
SF 400.1300000 MHz  
WDW EM  
SSB 0  
LB 0.30 Hz  
GB 0  
PC 1.00

avtar\_saifpu@yahoo.co.in

<sup>1</sup>H NMR of compound **2m**

NMe-P

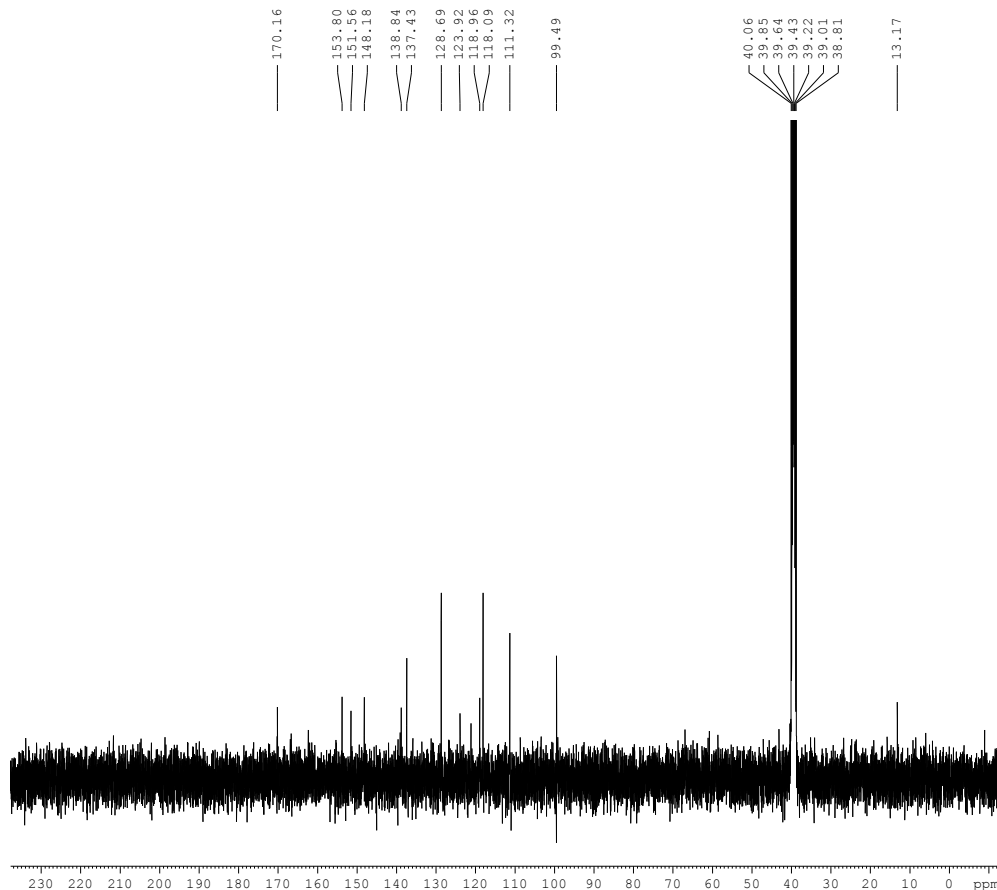

170.16  
153.80  
151.56  
148.18  
138.84  
137.43  
128.69  
123.92  
118.96  
118.09  
111.32  
99.49

40.06  
39.85  
39.64  
39.43  
39.22  
39.01  
38.80  
13.17

BRUKER  
AVANCE II 400 NMR  
Spectrometer  
SAIF  
Panjab University  
Chandigarh

Current Data Parameters  
NAME Feb02-2015-Administrator  
EXPNO 421  
PROCNO 1

F2 - Acquisition Parameters  
Date\_ 20150203  
Time 6.20  
INSTRUM spect  
PROBHD 5 mm PABBO BB-  
PULPROG zgpg30  
TD 65536  
SOLVENT DMSO  
NS 1024  
DS 4  
SWH 29761.904 Hz  
FIDRES 0.454131 Hz  
AQ 1.1010548 sec  
RG 36  
DW 16.800 usec  
DE 6.00 usec  
TE 294.2 K  
D1 2.00000000 sec  
d11 0.03000000 sec  
DELTA 1.89999998 sec  
TD0 1

==== CHANNEL f1 =====  
NUC1 13C  
P1 9.60 usec  
PL1 -2.00 dB  
SFO1 100.6228298 MHz

==== CHANNEL f2 =====  
CPDPRG2 waltz16  
NUC2 1H  
PCPD2 80.00 usec  
PL2 -3.00 dB  
PL12 14.31 dB  
PL13 18.00 dB  
SFO2 400.1316005 MHz

F2 - Processing parameters  
SI 32768  
SF 100.6128193 MHz  
WDW EM  
SSB 0  
LB 1.00 Hz  
GB 0  
PC 1.40

avtar\_saifpu@yahoo.co.in

<sup>13</sup>C NMR of compound 2m
